# Supplementary material for: Promoting the Diversity, Equity, and Inclusion in Organic Chemistry Education through Undergraduate Research Experiences at WSSU
Source: MDPI journal article supplement (doi:10.3390/educsci11080394), 2021-08-02
Supplement: s1 [file s1]

Archive with 1 entries (1 files):
- education-1267951-supplementary.pdf
